# Supplementary material for: Steroid hormone profiling in obese and nonobese women with polycystic ovary syndrome
Source: PubMed Central journal article supplement (PMC5658378; doi:10.1038/s41598-017-14534-2), 2017-10-26
Supplement: 41598_2017_14534_MOESM1_ESM.pdf [file 41598_2017_14534_MOESM1_ESM.pdf]

## **Steroid hormone profiling in obese and nonobese women with polycystic ovary syndrome**

Yuying Deng<sup>a#</sup>, Yifei Zhang<sup>a#</sup>, Shengxian Li<sup>b#</sup>, Wenzhong Zhou<sup>a</sup>, Lei Ye<sup>a</sup>, Lihua Wang<sup>b</sup>, Tao Tao<sup>b</sup>, Junjie Gu<sup>a</sup>, Zuwei Yang<sup>a</sup>, Dandan Zhao<sup>a</sup>, Weiqiong Gu<sup>a</sup>, Jie Hong<sup>a</sup>, Guang Ning<sup>a</sup>, Wei Liu<sup>b¶</sup>, Weiqing Wang<sup>a¶</sup>

# Yuying Deng, Yifei Zhang and Shengxian Li contributed equally to this work.

¶ Corresponding author: Weiqing Wang and Wei Liu.

**Supplementary Figure. S1. Flow diagram.**

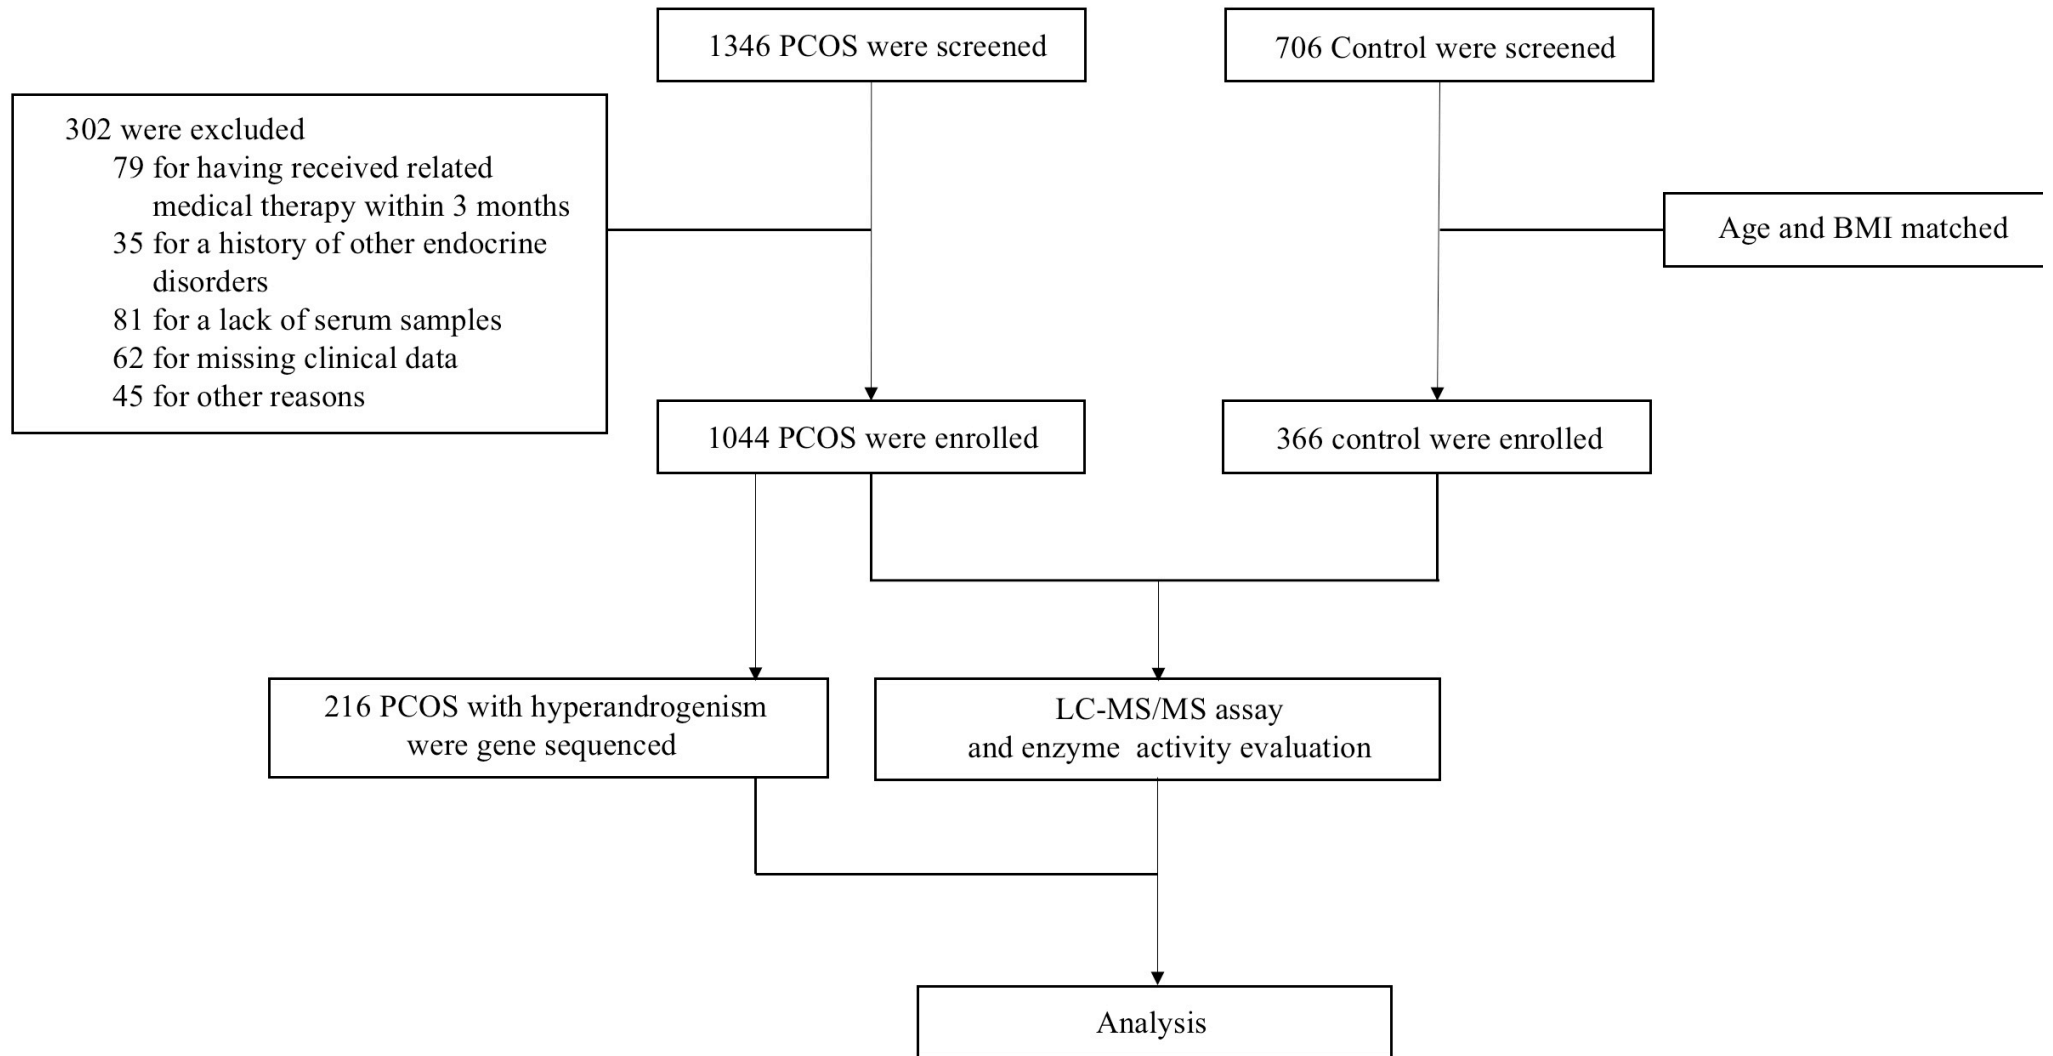

Supplementary Figure. S2. Enzymes activity of P450c21 in PCOS groups classified by BMI.

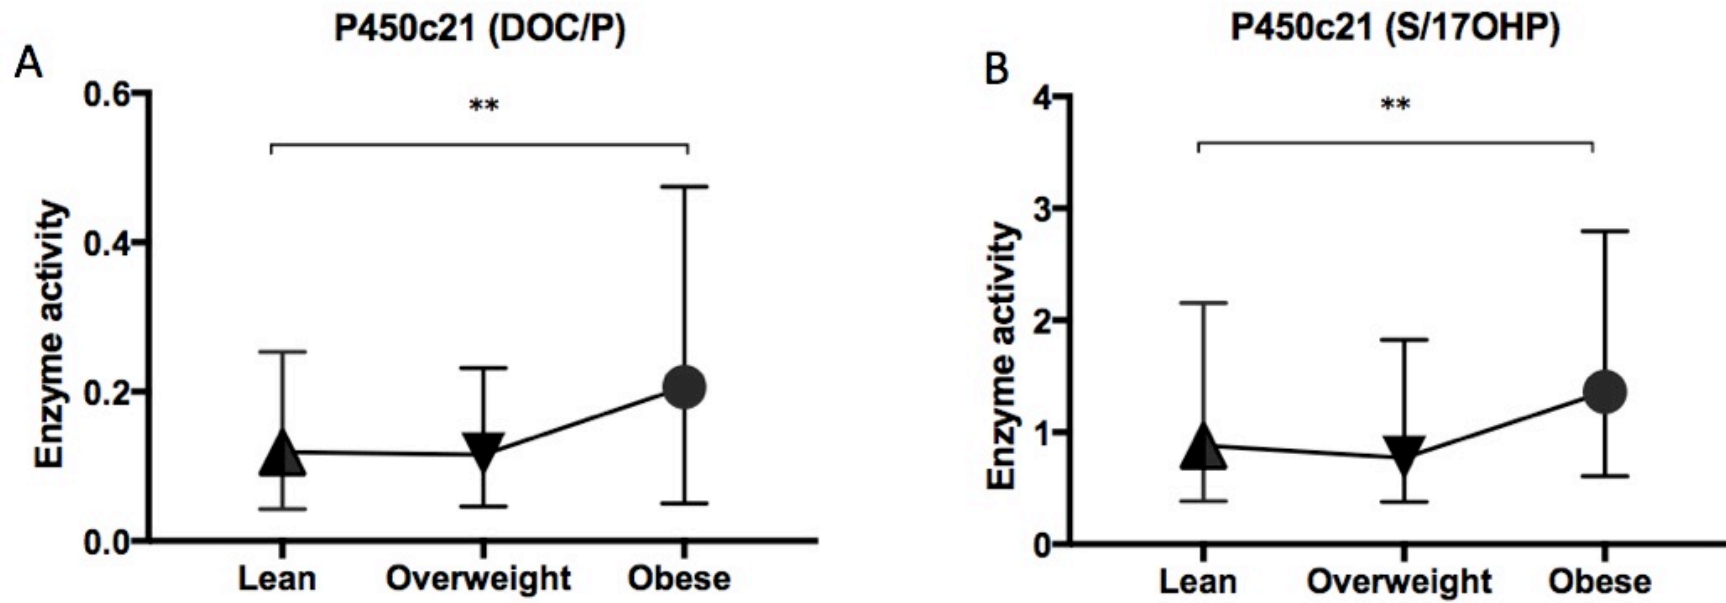

(A) The enzyme activity of P450c21 (DOC/P); (B) The enzyme activity of P450c21 (S/17-OHP).

Supplementary Fig. S3. Frequencies of CYP21A2 c. 552C>G (p. D184E) in 216 PCOS patients with hyperandrogenism classified by BMI.

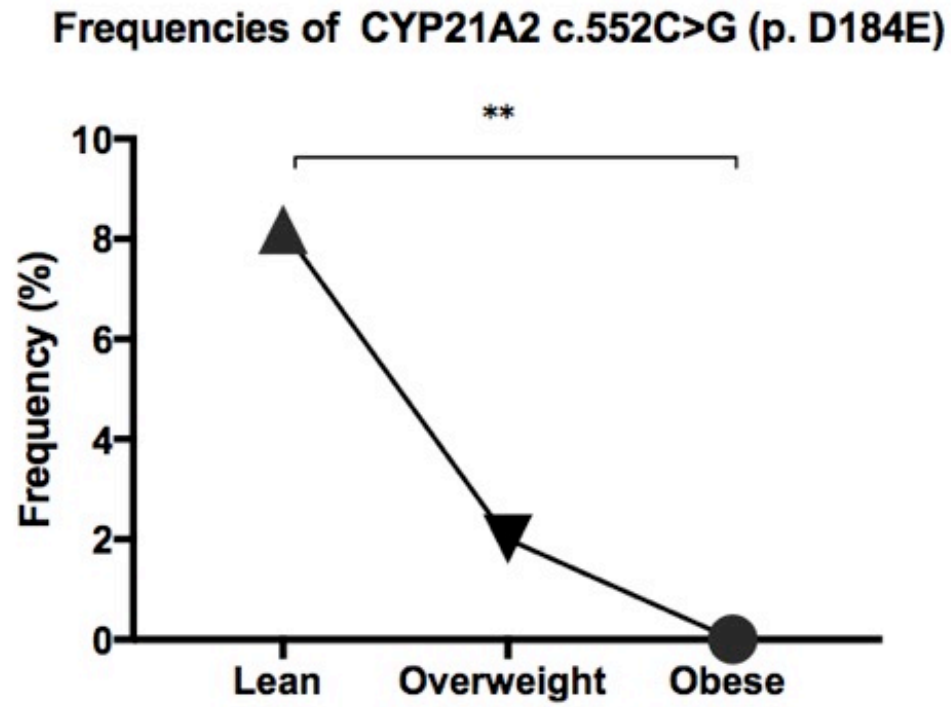

|                              | Control<br>(n=366)    | PCOS Phenotypes                   |                                   |                                     | P for trend in PCOS |
|------------------------------|-----------------------|-----------------------------------|-----------------------------------|-------------------------------------|---------------------|
|                              |                       | CA + PCOm<br>(n=418)              | HA+CA<br>(n=392)                  | HA+ CA+ PCOm<br>(n=234)             |                     |
| Age (y)                      | 26.0 (23.0, 32.0)     | 27.0 (23.0, 32.0)                 | 25.0 (20.0, 29.0) <sup>a</sup>    | 26.0 (21.0, 29.0)                   | 0.126 <sup>b</sup>  |
| BMI (kg/m <sup>2</sup> )     | 23.23 (20.74, 32.42)  | 27.93 (23.05, 32.23) <sup>a</sup> | 30.41 (25.10, 34.72) <sup>a</sup> | 27.04 (23.03, 31.09) <sup>a</sup>   | 0.073 <sup>b</sup>  |
| DHEAS (ng/ml)                | 989.0 (728.0, 1365.0) | 991.5 (678.5, 1400.0)             | 1110.0(755.0, 1500.0)             | 1210.0 (898.0, 1650.0) <sup>a</sup> | <0.001 <sup>c</sup> |
| 17-hydroprogrenolone (ng/ml) | 0.962 (0.450, 2.015)  | 1.050 (0.575, 1.983)              | 1.220 (0.680, 2.280) <sup>a</sup> | 1.420 (0.823, 2.980) <sup>a</sup>   | <0.001 <sup>c</sup> |
| Aldosterone (ng/ml)          | 0.037 (0.022, 0.061)  | 0.038 (0.020, 0.062)              | 0.041 (0.023,0.064)               | 0.037 (0.023, 0.064)                | 0.124 <sup>c</sup>  |
| Corticosterone (ng/ml)       | 1.620 (0.965, 2.723)  | 1.400 (0.843, 2.480) <sup>a</sup> | 1.790 (1.013, 3.256)              | 1.705 (0.968, 3.090)                | 0.001 <sup>c</sup>  |
| Cortisol (ng/ml)             | 73.95 (54.73, 105.00) | 77.30 (53.88, 108.03)             | 88.35 (58.18, 121.00)             | 97.10 (67.80, 135.00) <sup>a</sup>  | 0.020 <sup>c</sup>  |
| Cortisone (ng/ml)            | 29.50 (22.60, 39.60)  | 26.70 (21.56, 32.60)              | 32.35 (24.73, 42.03)              | 30.00 (24.50, 40.49)                | <0.001 <sup>c</sup> |
| Estrone (ng/ml)              | 0.536 (0.338, 0.915)  | 0.632 (0.384, 1.063) <sup>a</sup> | 0.650 (0.415, 0.996)              | 0.746 (0.451, 1.300) <sup>a</sup>   | 0.057 <sup>c</sup>  |
| Pregnenolone (ng/ml)         | 13.10 (7.71, 21.10)   | 11.04 (6.33, 20.55)               | 14.07 (7.69, 23.50)               | 11.50 (6.58, 24.83)                 | 0.070 <sup>c</sup>  |
| Deoxycorticosterone (ng/ml)  | 0.040 (0.025, 0.060)  | 0.030 (0.020, 0.047) <sup>a</sup> | 0.039 (0.025, 0.063)              | 0.037 (0.025, 0.058)                | 0.015 <sup>c</sup>  |
| 17-hydroprogesterone (ng/ml) | 0.225 (0.104, 0.674)  | 0.218 (0.132, 0.530)              | 0.297 (0.161, 0.539)              | 0.439 (0.261, 0.826) <sup>a</sup>   | 0.003 <sup>c</sup>  |
| 11-deoxycortisol (ng/ml)     | 0.263 (0.143, 0.432)  | 0.288 (0.165, 0.440)              | 0.330 (0.178, 0.600) <sup>a</sup> | 0.362 (0.198, 0.596) <sup>a</sup>   | 0.003 <sup>c</sup>  |
| Progesterone (ng/ml)         | 0.304 (0.090, 1.523)  | 0.250 (0.114, 0.941)              | 0.179 (0.083, 0.665) <sup>a</sup> | 0.299 (0.132, 1.163)                | 0.196 <sup>c</sup>  |
| Androstenedione (ng/ml)      | 1.858 (1.410, 2.343)  | 1.720 (1.350, 2.115) <sup>a</sup> | 2.880 (2.300, 3.810) <sup>a</sup> | 2.950 (2.298, 3.760) <sup>a</sup>   | <0.001 <sup>c</sup> |
| Testosterone (ng/ml)         | 0.332 (0.257, 0.426)  | 0.306 (0.247, 0.369) <sup>a</sup> | 0.573 (0.474, 0.730) <sup>a</sup> | 0.575 (0.474, 0.736) <sup>a</sup>   | <0.001 <sup>c</sup> |
| FAI                          | 0.66 (0.45, 1.20)     | 1.42 (0.80, 2.10) <sup>a</sup>    | 2.30 (1.42, 3.63) <sup>a</sup>    | 2.77 (1.62, 4.52) <sup>a</sup>      | <0.001 <sup>c</sup> |

**Supplementary Table S1. Steroid hormone profiling measured with LC-MS/MS in the three PCOS phenotype groups and controls.**

Data are presented as median (25,75 percentile). <sup>a</sup>P<0.05 vs controls; <sup>c</sup>ANVOVA for trend with age and BMI as covariate.

| <b>Steroid hormones</b> | <b>r</b> | <b>P value</b>   |
|-------------------------|----------|------------------|
| DHEAS                   | -0.110   | <b>0.001</b>     |
| 17OH-progesterone       | -0.190   | <b>&lt;0.001</b> |
| Progesterone            | -0.075   | <b>0.023</b>     |
| Estrone                 | -0.104   | <b>0.002</b>     |
| 17OH-pregnenolone       | -0.038   | 0.254            |
| Aldosterone             | 0.055    | 0.110            |
| Corticosterone          | -0.013   | 0.694            |
| Cortisol                | -0.037   | 0.263            |
| Cortisone               | 0.059    | 0.078            |
| Pregnenolone            | 0.048    | 0.153            |
| Androstenedione         | 0.014    | 0.671            |
| 11-deoxycortisol        | -0.063   | 0.055            |
| Deoxycorticosterone     | -0.051   | 0.121            |
| Testosterone            | 0.035    | 0.291            |

**Supplementary Table S2. Correlation of BMI with steroid hormones in the PCOS groups.**

| <b>Enzyme</b>   | <b>Product/precursor ratio</b> | <b>r</b> | <b>P value</b> |
|-----------------|--------------------------------|----------|----------------|
| P450c17         | 17OHP5/P5                      | -0.097   | <b>0.004</b>   |
| P450c17         | A/17OHP                        | 0.014    | 0.673          |
| P450c17         | 17OHP/P                        | 0.034    | 0.309          |
| P450c21         | 11DOC/P                        | 0.157    | <b>0.000</b>   |
| P450c21         | S/17OHP                        | 0.157    | <b>0.000</b>   |
| P450c11 $\beta$ | F/S                            | 0.040    | 0.223          |
| P450c11 $\beta$ | B/DOC                          | 0.023    | 0.497          |
| P450aro         | E1/AD2                         | -0.162   | <b>0.000</b>   |
| P450c11AS       | Aldo/B                         | 0.043    | 0.214          |
| 3 $\beta$ HSD2  | 17OHP/17OHP5                   | -0.183   | <b>0.000</b>   |
| 3 $\beta$ HSD2  | P/P5                           | -0.149   | <b>0.000</b>   |
| 11 $\beta$ HSD2 | Cortisone/F                    | 0.055    | 0.102          |
| 17 $\beta$ HSD3 | T/AD2                          | 0.013    | 0.691          |

**Supplementary Table S3. Correlation of BMI with enzymes activity in the PCOS groups.**

| Gene           | Enzyme         | Product/precursor ratio           | Polymorphism sites                                                                                                                                                                                                                                                                                   |
|----------------|----------------|-----------------------------------|------------------------------------------------------------------------------------------------------------------------------------------------------------------------------------------------------------------------------------------------------------------------------------------------------|
| <i>CYP17A1</i> | P450c17        | 17OHP5/P5<br>17-OHP/P<br>A/17-OHP | c.195G>T, c.138C>T, c.152154delAAG, c.2325G>T, c.1098T>G, c.414C>A,<br>c.32C>T.                                                                                                                                                                                                                      |
| <i>CYP21A2</i> | P450c21        | DOC/P<br>S/17OHP                  | c.118C>T, c.138C>A, c.1481G>A, c.1473G>A, c.806G>C, c.747C>G, c.371C>T,<br>c.308G>A, c.1125C>T, c.1618delCTG, c.12717G>A, c.933G>A,<br>c.325326delTGinsCA, c.950G>A, c.79A>G, c.327C>G, c.332339delGAGACTAC,<br>c.342C>T, c.518T>A, c.12716C>T, c.955C>T, c.45C>T, c.1456A>G, c.552C>G,<br>c.844G>T. |
| <i>HSD3B2</i>  | 3 $\beta$ HSD2 | P/P5<br>17OHP/17OHP5              | c.924C>T, c.500C>T, c.465G>A, c.549G>A.                                                                                                                                                                                                                                                              |

**Supplementary Table S4. Single nucleotide polymorphisms (SNPs) in the steroidogenic pathway in 216 PCOS patients with hyperandrogenism.**



| PCOS group | CYP21A2 c. 552C>G (p. D184E) |                  | Total |
|------------|------------------------------|------------------|-------|
|            | With mutation                | Without mutation |       |
| BMI<25     | 5 (8.2%) <sup>a</sup>        | 56 (91.8%)       | 61    |
| BMI 25-30  | 1 (2.0%)                     | 48 (98.0%)       | 49    |
| BMI ≥30    | 0 (0.0%) <sup>a</sup>        | 106 (100%)       | 106   |
| Total      | 6 (2.8%)                     | 210 (97.2%)      | 216   |

**Supplementary Table S5. CYP21A2 c. 552C>G (p. D184E) frequencies in 216 obese and nonobese PCOS patients with hyperandrogenism.**

Data are presented as number (%). <sup>a</sup> The same superscripts indicate a statistically significant difference ( $P<0.05$ ) between pairs.

|                          | BMI<25<br>(n=61)                   | 25≤BMI <30<br>(n=49)               | BMI≥30<br>(n=106)                    |
|--------------------------|------------------------------------|------------------------------------|--------------------------------------|
| <b><i>CYP17A1</i></b>    |                                    |                                    |                                      |
| P450c17 (17OHP5/P5)      | 0.262 (0.085, 0.663) <sup>a</sup>  | 0.147 (0.056, 0.389)               | 0.096 (0.054, 0.200) <sup>a</sup>    |
| P450c17 (17OHP/P)        | 1.943 (0.366, 3.420)               | 0.719 (0.191, 2.108)               | 0.957 (0.183, 3.682)                 |
| P450c17 (AD2/17OHP)      | 6.950 (2.438, 10.924) <sup>a</sup> | 9.074 (4.759, 13.546) <sup>b</sup> | 12.000 (7.904, 16.038) <sup>ab</sup> |
| <b><i>HSD3B2</i></b>     |                                    |                                    |                                      |
| 3βHSD2 (P/P5)            | 0.047 (0.018, 0.260)               | 0.045 (0.008, 0.364)               | 0.016 (0.006, 0.255)                 |
| 3βHSD2<br>(17OHP/17OHP5) | 0.241 (0.151, 0.633)               | 0.235 (0.124, 0.574)               | 0.187 (0.109, 0.467)                 |
| <b><i>CYP21A2</i></b>    |                                    |                                    |                                      |
| P450c21 (DOC/P)          | 0.138 (0.040, 0.263)               | 0.073 (0.015, 0.244)               | 0.147 (0.020, 0.416)                 |
| P450c21 (S/17OHP)        | 0.865 (0.301, 1.820)               | 0.772 (0.382, 2.342)               | 1.274 (0.567, 2.321)                 |

**Supplementary Table S6. Enzyme activity evaluation in 216 PCOS patients with hyperandrogenism.**

Data are presented as median (25,75 percentile). <sup>abcdef</sup> The same superscripts indicate a statistically significant difference ( $P<0.05$ ) between pairs.
